# Supplementary material for: Urban Flood-Related Remote Sensing: Research Trends, Gaps and Opportunities
Source: MDPI journal article supplement (doi:10.3390/rs14215505), 2022-11-01
Supplement: s1 [file s1]

“Urban flood-related remote sensing: research trends, gaps, and opportunities” by Zhu Wei et al.

**S1.** Query string for Web of Science.

| Database                      | Query string                                                                                                                                                                                                                                                                                                                                                                                                                                                                                                                                                                                                                                                                                                                                                                                                                                                                                                                                                                                                                                                                                                                                                                                                                        |
|-------------------------------|-------------------------------------------------------------------------------------------------------------------------------------------------------------------------------------------------------------------------------------------------------------------------------------------------------------------------------------------------------------------------------------------------------------------------------------------------------------------------------------------------------------------------------------------------------------------------------------------------------------------------------------------------------------------------------------------------------------------------------------------------------------------------------------------------------------------------------------------------------------------------------------------------------------------------------------------------------------------------------------------------------------------------------------------------------------------------------------------------------------------------------------------------------------------------------------------------------------------------------------|
| Web of Science <sup>1,2</sup> | (TS=("remote* sens*") OR TS=(map*) OR TS=(inspection*) OR TS=(surve*) OR TS=(imag*) OR TS=("search* area") OR TS=("structure from motion") OR TS=(SFM*) OR TS=(photograph*) OR TS=(photogrammetr*) OR TS=(LIDAR) OR TS=("laser scan*") OR TS=("synthetic aperture radar") OR TS=("light detection and ranging") OR TS=(infrared) OR TS=(thermal) OR TS=(hyperspectral) OR TS=(multispectral) OR TS=("red green blue") OR TS=(RGB) OR TS=(video*) OR TS=(camera*) OR TS=("point cloud*") OR TS=(orthophoto*) OR TS=(orthomosaic*) OR TS=(raster*) OR TS=("digital terrain model*") OR TS=("digital elevation model*") OR TS=("elevation model*") OR TS=("digital surface model*") OR TS=("digital terrain") OR TS=(DTM) OR TS=(DTMs) OR TS=(DEM) OR TS=(DEMs) OR TS=(DSM) OR TS=(DSMs) OR TS=(3D) OR TS=("3 dimensional") OR TS=("three dimensional") OR TS=("deep learning") OR TS=("computer vision") OR TS=("convolutional neural network*") OR TS=(convnet*) OR TS=("pixel based") OR TS=("object based") OR TS=("informatics tool*") OR TS=("target detection")) AND (TS=("urban*") OR TS=("city*") OR TS=("metropolitan*")) AND (TS=("flood*") OR TS=("flood* hazard*") OR TS=("flood* analysis*") OR TS=("flood* modeling*")) |

<sup>1</sup>TS = title, abstract, keywords

<sup>2</sup>Advanced search with English language and Article document type options selected
